# Supplementary material for: Transcriptome Profiling Reveals Molecular Responses to Salt Stress in Common Vetch (Vicia sativa L.)
Source: MDPI journal article supplement (doi:10.3390/plants13050714), 2024-03-03
Supplement: s1 [file s1]

## Supporting information

**Table S1. Primers used for qRT-PCR analysis.**

| Gene name    | Primer name    | Sequence                   |
|--------------|----------------|----------------------------|
| CCR1         | Y9361, forward | AAGGAGCGAAGGAAAGACTAAC     |
|              | Y9362, reverse | TGCTAATGCCACATCCCTAAC      |
| CCR2         | Y9363, forward | GTTAGAGGAACCCTCAGAAACC     |
|              | Y9364, reverse | GTTATGGGAAGACAGTGGCA       |
| CAD1         | Y9365, forward | CTTGGGAGTGACGACGTTTAT      |
|              | Y9366, reverse | GATACGCCACTTCCATCGTAG      |
| CAD2         | Y9367, forward | AGGTTCTAGAGGTGGGATCAA      |
|              | Y9368, reverse | TGATACTGTTTCCTGTTGGTCAC    |
| AKT2         | Y9261, forward | CATCATCCTACATCATCTTCATCTTC |
|              | Y9262, reverse | AGTTGCTTTTCATGCATTCTTCTC   |
| HAK17        | Y9263, forward | GTCTGCAATGGATGGAGTTAGA     |
|              | Y9264, reverse | TTATCTCCGCACTACATTGTCC     |
| APX4         | Y9351, forward | GTCCTTGTAAGTAAGGCAAGAAAGA  |
|              | Y9352, reverse | TATCACGGAGATGCGACTCA       |
| CAT1         | Y9353, forward | CCCAAGTGGAAGTTTCGGTATT     |
|              | Y9354, reverse | AGTAGTTGACGGTGCCTTTG       |
| P5CS1        | Y9355, forward | GCGTTGGAAGCTGGATATGA       |
|              | Y9356, reverse | CTTATCGGGCTTGTCACCTCA      |
| Unigene68614 | Y7554, forward | GCTAAAGCATTGAACAACAAAAGA   |
|              | Y7555, reverse | GCAAAGTTTGTCCCTTCACC       |

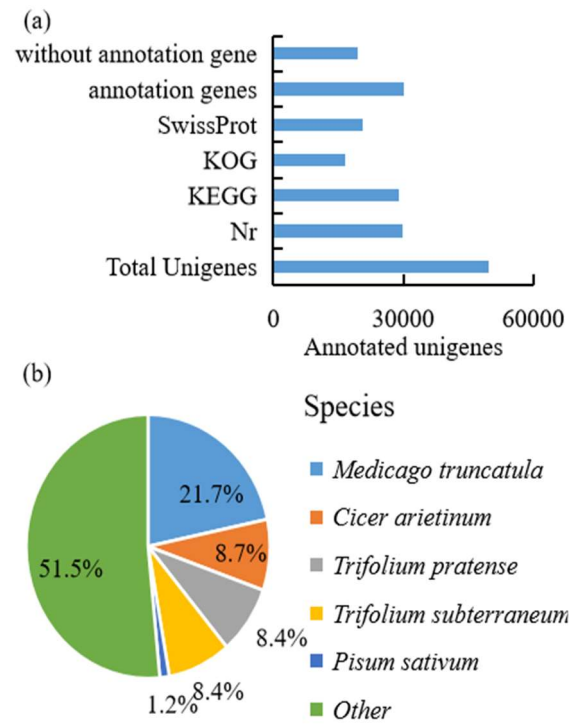

**Figure S1. Annotation statistics and species distribution of all unigenes**

(a) Statistics of unigenes annotation. (b) The species distribution of the total homologous sequences.

Figure S2

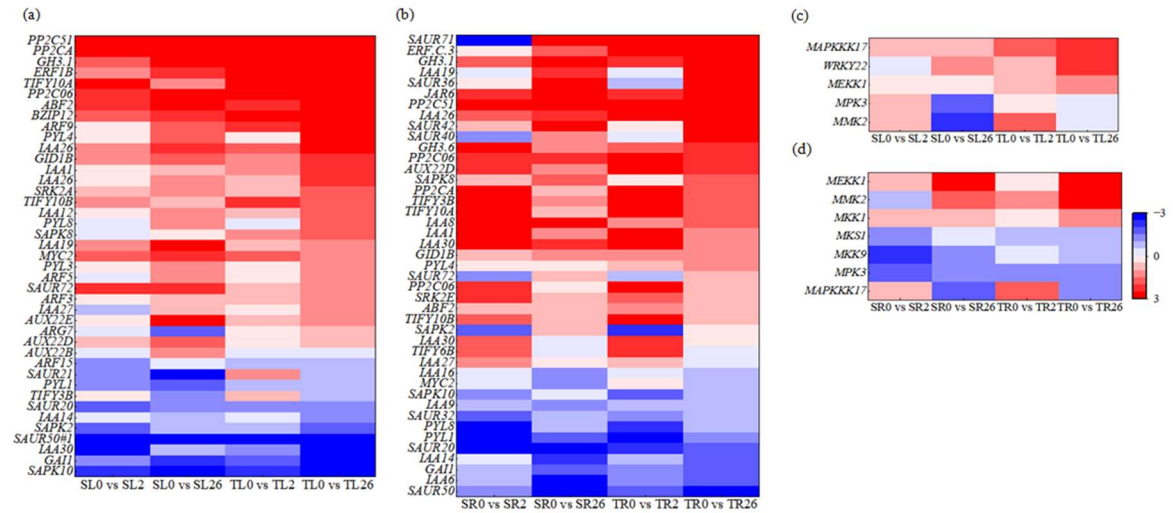

**Figure S2. Heatmap of the DEGs involved in plant hormone and MAPK signaling pathways in two common vetch collections in response to salt stress.**

The DEGs involved in plant hormone signal transduction in leaves (a) and roots (b) and MAPK signaling in leaves (c) and roots (d) were presented respectively. The color scale represents log<sub>2</sub>-transformed FPKM (fragments per kilobyte per million reads) values. The gradual change of the color indicates the different expression levels of DEGs, Red color indicates up-regulation, and blue color indicates down-regulation. SL, leaves in salt-sensitive collection 429; TL, leaves in salt-tolerant collection 460; SR, roots in salt-sensitive collection 429; TR, roots salt-tolerant collection 460. 0, 1, 2 represent 0, 2, 26 h after salt treatment, respectively.

Figure S3

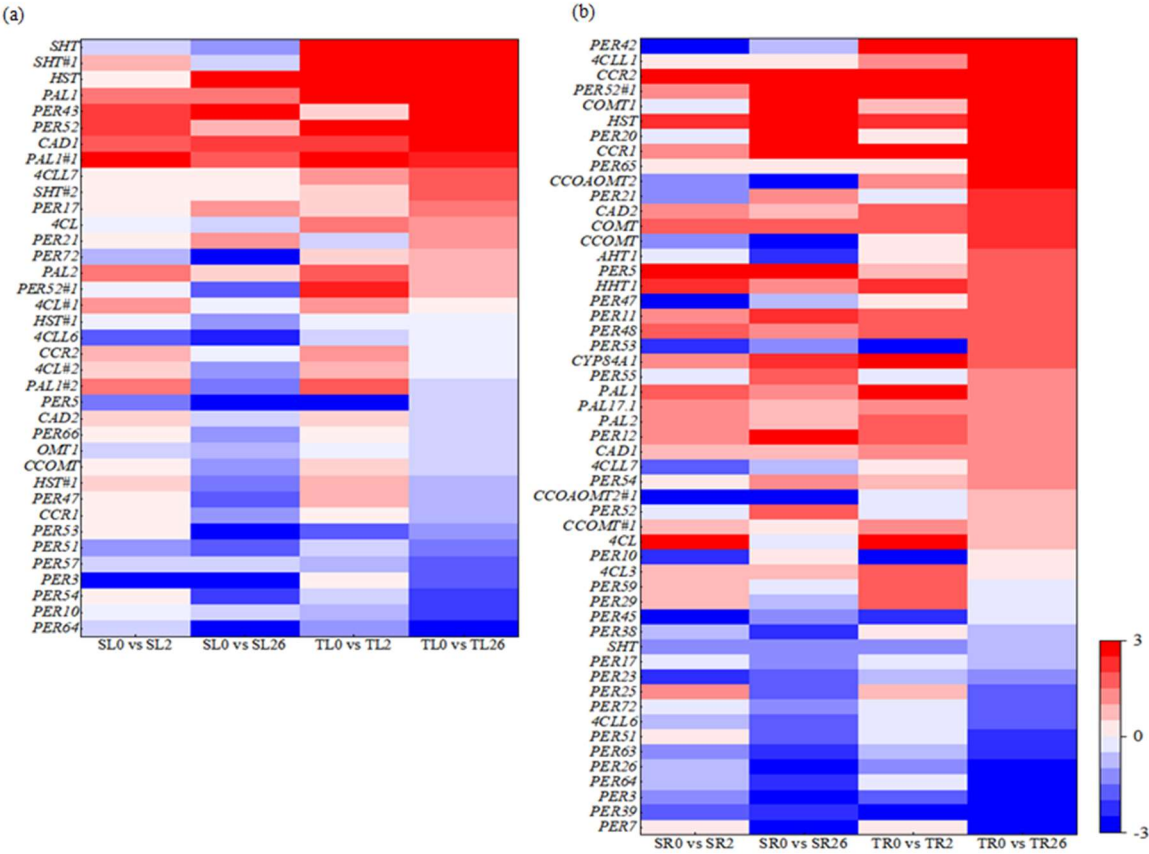

**Figure S3. Heatmap of the DEGs involved in phenylpropanoid biosynthesis in two common vetch collections in response to salt stress**

The DEGs involved in phenylpropanoid biosynthesis in leaves (a) and roots (b) were presented. The color scale represents log<sub>2</sub>-transformed FPKM (fragments per kilobyte per million reads) values. The gradual change of the color indicates the different expression levels of DEGs. Red color indicates up-regulation, and blue color indicates down-regulation. SL, leaves in salt-sensitive collection 429; TL, leaves in salt-tolerant collection 460; SR, roots in salt-sensitive collection 429; TR, roots salt-tolerant collection 460. 0, 1, 2 represent 0, 2, 26 h after salt treatment, respectively.

**Figure S4**

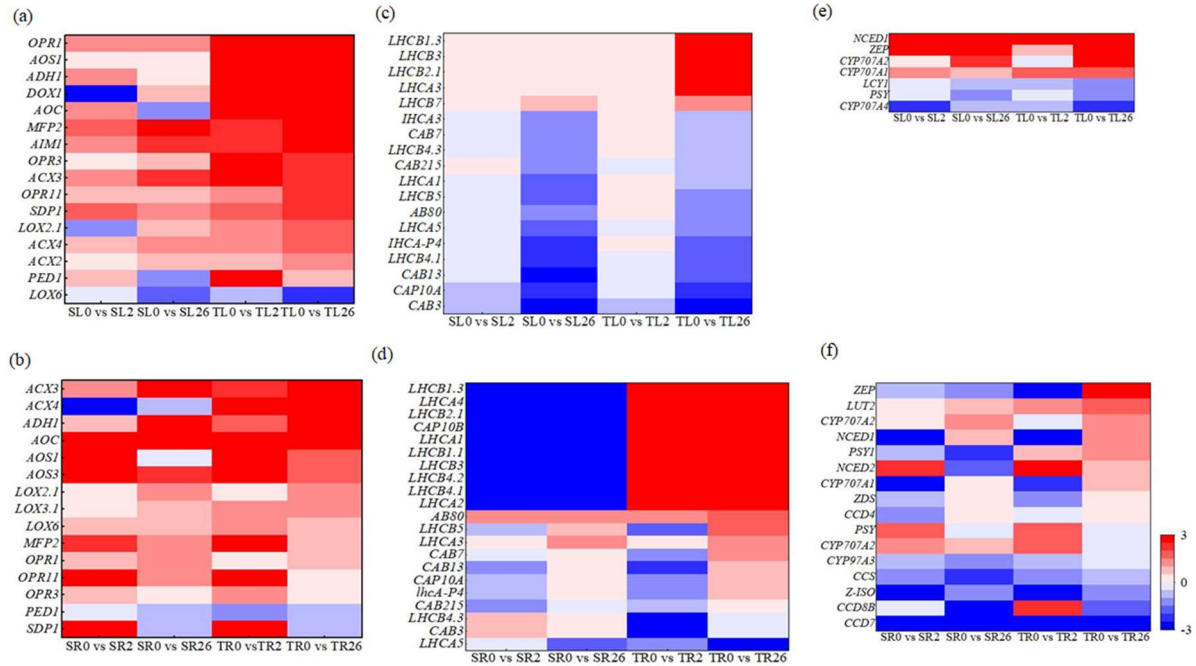

**Figure S4. Heatmap of DEGs involved in alpha-linolenic acid metabolism, photosynthesis-antennain, and carotenoid biosynthesis of 429 and 460 in response to salt stress**

The DEGs involved in alpha-linolenic acid metabolism (a, b), photosynthesis-antennain (c, d), and carotenoid biosynthesis (e, f) were presented. The data from leaves were represented in (a), (c), and (e), while those from roots in (b), (d), and (f). The color scale represents log<sub>2</sub>-transformed FPKM (fragments per kilobyte per million reads) values. The gradual change of the color indicates the different expression levels of DEGs. Red color indicates up-regulation, and blue color indicates down-regulation. SL, leaves in salt-sensitive collection 429; TL, leaves in salt-tolerant collection 460; SR, roots in salt-sensitive collection 429; TR, roots salt-tolerant collection 460. 0, 1, 2 represent 0, 2, 26 h after salt treatment, respectively.
